# Supplementary material
Source: Research Square preprint supplement (doi:10.21203/rs.3.rs-9164952/v1)
Supplement: Supplementary file 1 [file 2ae7b823ca1aab357fa708d2.pdf]

Additional file 1 Primer sequences used in the study

| Genes         | Forward primer sequences (5'-3') | Reverse primer sequences (5'-3') |
|---------------|----------------------------------|----------------------------------|
| <i>EOMES</i>  | CGGCGTTCAATCCTTCTCC              | CCACCTCTTCGCTCTGTTGG             |
| <i>TBXT</i>   | ACCCAGTTCATAGCGGTGAC             | TCTCCGGGTTCCATCAT                |
| <i>GATA4</i>  | CCTCTTTCTCAGCAGAGCTGTA           | CTCTGCTACAGCCAGTAGGATT           |
| <i>POU5F1</i> | CTGTCTCCGTCACCACTCTG             | AAACCCTGGCACAAACTCCA             |
| <i>NANOG</i>  | AACTCTCCAACATCCTGAACCT           | GCGTCACACCATTGCTATTCT            |
| <i>LIN28A</i> | GTTCGGCTTCCTGTCCAT               | CTGCCTCACCTCCTTCA                |
| <i>PRDM1</i>  | ACGGCCTTCAAATGTCAGACTTG          | TCTTGAGATTGCTGGTGCTGCTAA         |
| <i>TFAP2C</i> | ATTAAGAGGATGCTGGGCTCTG           | CACTGTAAGTGCACACTCACCTT          |
| <i>NANOS3</i> | CCTCACCGCTACAACATCCT             | TTGATTCCACTGCTGCCTTG             |
| <i>GAPDH</i>  | TCCACCCATGGCAAATCC               | TCGCCCCACTTGATTTGG               |
