# Supplementary material
Source: Research Square preprint supplement (doi:10.21203/rs.3.rs-9164952/v1)
Supplement: Supplementary file 2 [file 56b2d963ea0116d4b8300f8b.pdf]

### Pluripotency genes

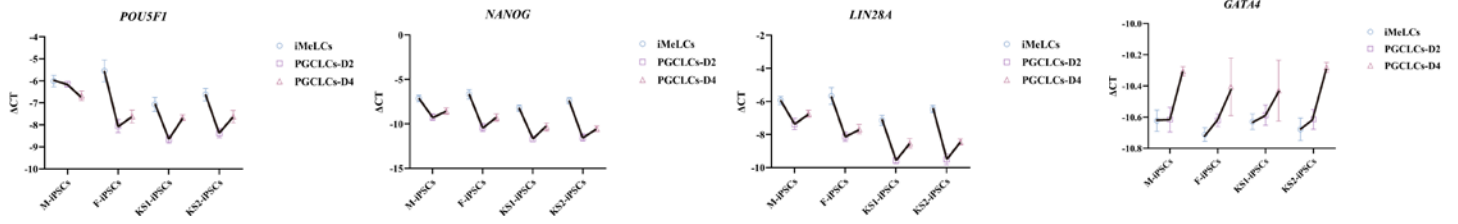

**Additional file 4** Gene expression dynamics of pluripotency-associated genes (*POU5F1*, *NANOG*, and *LIN28A*) and endoderm genes *GATA4* in aggregates during iMeLC stage, D2, and D4 of PGCLC induction, as measured by qPCR.
