# Supplementary material
Source: Research Square preprint supplement (doi:10.21203/rs.3.rs-9164952/v1)
Supplement: Supplementary file 3 [file 6c76e8bef6bb0d0e85a104ad.pdf]

Additional file 3 Clinical examination results of KS patients in this study

| Parameter                                  | KS1    | KS2     | Normal range  |
|--------------------------------------------|--------|---------|---------------|
| age                                        | 43     | 32      | -             |
| height, cm                                 | 174    | 177     | -             |
| weight, kg                                 | 74     | 85      | -             |
| body mass index, kg/m <sup>2</sup>         | 24.44  | 27.13   | -             |
| karyotype                                  | 47,XXY | 47,XXY  | 46,XY         |
| bilateral testicular volume (mL)           | 3/3    | 2.3/3.1 | 15-32         |
| semen volume (mL)                          | 2.5    | 2.1     | ≥1.5          |
| semen pH value                             | 7.4    | 7.4     | ≥7.2          |
| sperm concentration (×10 <sup>6</sup> /mL) | 0      | 0       | ≥15           |
| estradiol (pg/mL)                          | 28.94  | 26.23   | < 39.8        |
| Follicle-Stimulating Hormone (mIU/mL)      | 38.56  | 47.51   | 1.4-18.1      |
| Testosterone hormone (ng/dL)               | 78.08  | 181.51  | 197.44-669.58 |
