# Supplementary material
Source: Research Square preprint supplement (doi:10.21203/rs.3.rs-9164952/v1)
Supplement: Supplementary file 4 [file bbf0435148a906954a76cfec.pdf]

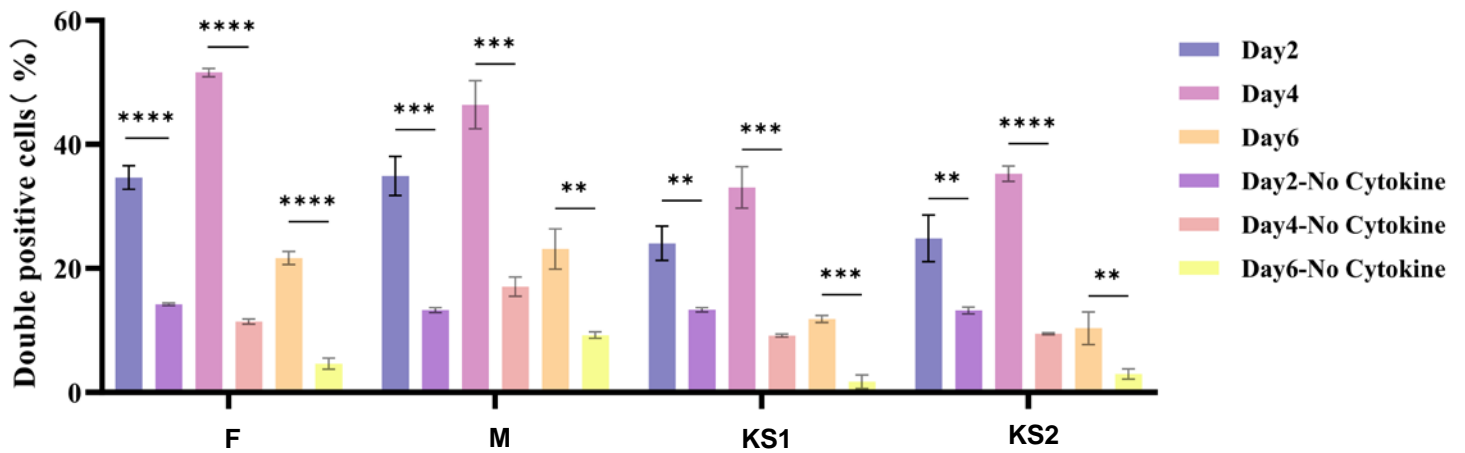

**Additional file 5** Comparisons of percentages of double-positive cells in Day 2, 4, and 6 PGCLC aggregates from the indicated groups stimulated with full or no cytokines (BMP4, SCF, EGF, and LIF) were conducted using ANOVA. Asterisk indicates statistically significant differences (\* $p < 0.05$ , \*\* $p < 0.01$  and \*\*\* $p < 0.001$  ) between percentages of double-positive cells stimulated with full cytokines and those without cytokines.
