# Supplementary material
Source: Research Square preprint supplement (doi:10.21203/rs.3.rs-9164952/v1)
Supplement: Supplementary file 5 [file d73aff51bf223bd59c3207af.pdf]

Additional file 2 Antibodies used in the study

| Name                                                   | Manufacturer                          | Dilution ratio |
|--------------------------------------------------------|---------------------------------------|----------------|
| POU5F1 Rabbit Monoclonal antibody                      | Immunoway                             | 1:200          |
| POU5F1 Mouse Monoclonal antibody                       | Proteintech                           | 1:200          |
| PRDM1/Blimp-1 Mouse Monoclonal antibody                | Santa                                 | 1:100          |
| TFAP2C Rabbit Polyclonal Antibody                      | Immunoway                             | 1:200          |
| SSEA4 Rabbit Monoclonal Antibody                       | Invitrogen                            | 1:200          |
| Alexa Fluor 488–conjugated goat anti-mouse IgG (H+L)   | Zhongshan Golden Bridge Biotechnology | 1:200          |
| Alexa Fluor 488–conjugated goat anti- rabbit IgG (H+L) | Zhongshan Golden Bridge Biotechnology | 1:200          |
| Alexa Fluor 594–conjugated goat anti-mouse IgG (H+L)   | Zhongshan Golden Bridge Biotechnology | 1:200          |
| Alexa Fluor 594–conjugated goat anti- rabbit IgG (H+L) | Zhongshan Golden Bridge Biotechnology | 1:200          |
